# Supplementary material
Source: Springer Nature journal article supplement (https://www.springermedizin.de/resource/supplementary/12906_2012_1249_MOESM1_ESM.pdf/9520206)
Supplement: MOESM1 [file 9520206]

**1. Visiting health care providers: Please fill in all physicians and other therapists that treated you using complementary and alternative medicine. This refers to all physicians and non-physicians that treated you with CAM.**

| Have you seen any of the following providers <b>in the last 12 months?</b>                                               | Yes<br>No                                         | Number of times you have seen this provider <b>in the last 3 months</b> | Please indicate the <u>main reason</u> you <u>last</u> saw the provider.     |                                                                                                   |                              |                                                   | How helpful was it for you to see this provider?<br>(Tick only one box) |                          |                          |                          |
|--------------------------------------------------------------------------------------------------------------------------|---------------------------------------------------|-------------------------------------------------------------------------|------------------------------------------------------------------------------|---------------------------------------------------------------------------------------------------|------------------------------|---------------------------------------------------|-------------------------------------------------------------------------|--------------------------|--------------------------|--------------------------|
|                                                                                                                          |                                                   |                                                                         | Due to an <b>acute illness/condition</b> (one that lasted less than 1 month) | Treatment for a <b>long-term health condition or its symptoms</b> (that lasted more than 1 month) | To <b>improve</b> well-being | <b>Others</b> (please specify your other reasons) | Very                                                                    | Somewhat                 | Not at all               | I don't now              |
| <b>Homeopath</b> (physicians that predominantly treat using homeopathy)                                                  | <input type="checkbox"/> <input type="checkbox"/> | _____                                                                   | <input type="checkbox"/>                                                     | <input type="checkbox"/>                                                                          | <input type="checkbox"/>     | _____                                             | <input type="checkbox"/>                                                | <input type="checkbox"/> | <input type="checkbox"/> | <input type="checkbox"/> |
| <b>Acupuncturist</b> (physicians that provide acupuncture)                                                               | <input type="checkbox"/> <input type="checkbox"/> | _____                                                                   | <input type="checkbox"/>                                                     | <input type="checkbox"/>                                                                          | <input type="checkbox"/>     | _____                                             | <input type="checkbox"/>                                                | <input type="checkbox"/> | <input type="checkbox"/> | <input type="checkbox"/> |
| <b>Medical CAM specialist</b> (physicians that provide a range of different CAM-therapies)                               | <input type="checkbox"/> <input type="checkbox"/> | _____                                                                   | <input type="checkbox"/>                                                     | <input type="checkbox"/>                                                                          | <input type="checkbox"/>     | _____                                             | <input type="checkbox"/>                                                | <input type="checkbox"/> | <input type="checkbox"/> | <input type="checkbox"/> |
| <b>Non-medical CAM specialist</b> (Non-physicians that provide a range of different CAM-therapies)                       | <input type="checkbox"/> <input type="checkbox"/> | _____                                                                   | <input type="checkbox"/>                                                     | <input type="checkbox"/>                                                                          | <input type="checkbox"/>     | _____                                             | <input type="checkbox"/>                                                | <input type="checkbox"/> | <input type="checkbox"/> | <input type="checkbox"/> |
| <b>Osteopath</b> (Physicians and Non-physicians that provide Osteopathy)                                                 | <input type="checkbox"/> <input type="checkbox"/> | _____                                                                   | <input type="checkbox"/>                                                     | <input type="checkbox"/>                                                                          | <input type="checkbox"/>     | _____                                             | <input type="checkbox"/>                                                | <input type="checkbox"/> | <input type="checkbox"/> | <input type="checkbox"/> |
| <b>Chirotherapist</b> (Physicians and Non-physicians that provide chirotherapy)                                          | <input type="checkbox"/> <input type="checkbox"/> | _____                                                                   | <input type="checkbox"/>                                                     | <input type="checkbox"/>                                                                          | <input type="checkbox"/>     | _____                                             | <input type="checkbox"/>                                                | <input type="checkbox"/> | <input type="checkbox"/> | <input type="checkbox"/> |
| <b>Other Physicians and Providers that treated you with CAM</b> (please specify, which treatment/ therapy you received): | <input type="checkbox"/> <input type="checkbox"/> | _____                                                                   | <input type="checkbox"/>                                                     | <input type="checkbox"/>                                                                          | <input type="checkbox"/>     | _____                                             | <input type="checkbox"/>                                                | <input type="checkbox"/> | <input type="checkbox"/> | <input type="checkbox"/> |
| _____                                                                                                                    | <input type="checkbox"/> <input type="checkbox"/> | _____                                                                   | <input type="checkbox"/>                                                     | <input type="checkbox"/>                                                                          | <input type="checkbox"/>     | _____                                             | <input type="checkbox"/>                                                | <input type="checkbox"/> | <input type="checkbox"/> | <input type="checkbox"/> |
| _____                                                                                                                    | <input type="checkbox"/> <input type="checkbox"/> | _____                                                                   | <input type="checkbox"/>                                                     | <input type="checkbox"/>                                                                          | <input type="checkbox"/>     | _____                                             | <input type="checkbox"/>                                                | <input type="checkbox"/> | <input type="checkbox"/> | <input type="checkbox"/> |
| _____                                                                                                                    | <input type="checkbox"/> <input type="checkbox"/> | _____                                                                   | <input type="checkbox"/>                                                     | <input type="checkbox"/>                                                                          | <input type="checkbox"/>     | _____                                             | <input type="checkbox"/>                                                | <input type="checkbox"/> | <input type="checkbox"/> | <input type="checkbox"/> |
